# Supplementary material for: Vitamin and Mineral Supplementation Practices in Preterm Infants: A Survey of Australian and New Zealand Neonatal Intensive and Special Care Units
Source: PubMed Central journal article supplement (PMC7019934; doi:10.3390/nu12010051), 2019-12-23
Supplement: nutrients-12-00051-s001.pdf [file nutrients-12-00051-s001.pdf]

## Table 1 Survey questions

### Part 2

|                                                                                                                                                       |                |
|-------------------------------------------------------------------------------------------------------------------------------------------------------|----------------|
| <b>1. Does your unit have a written policy on the following:</b>                                                                                      |                |
| Screening criteria for dietitian referral                                                                                                             | Yes/No         |
| Enteral Feeding                                                                                                                                       | Yes/No         |
| Intravenous feeding                                                                                                                                   | Yes/No         |
| Withholding feeds                                                                                                                                     | Yes/No         |
| Gastric aspirate volumes                                                                                                                              | Yes/No         |
| Vitamin and mineral supplementation (inpatient)                                                                                                       | Yes/No         |
| Other                                                                                                                                                 | please specify |
| <b>2. Which country is your hospital in?</b>                                                                                                          |                |
| New Zealand                                                                                                                                           |                |
| Australia                                                                                                                                             |                |
| <b>3. What is the name of the hospital where you work?</b>                                                                                            |                |
| <b>4. In your unit, is a vitamin D supplement prescribed for preterm infants? If yes, what is the criteria (birthweight, gestational age, other)?</b> |                |
| <b>5. What is the name of the inpatient vitamin D supplement and dose (in ml)</b>                                                                     |                |
| Vitadol C                                                                                                                                             |                |
| Pentavite                                                                                                                                             |                |
| Puria                                                                                                                                                 |                |
| Other (please specify)                                                                                                                                |                |
| <b>6. Is vitamin D prescribed on discharge? If yes, what is the criteria for who gets it?</b>                                                         |                |
| <b>7. If yes, what is the name of the vitamin D supplement and dose (in ml) on discharge?</b>                                                         |                |
| Vitadol C                                                                                                                                             |                |
| Pentavite                                                                                                                                             |                |
| Puria                                                                                                                                                 |                |
| Other (please specify)                                                                                                                                |                |
| <b>8. When is this Vitamin D stopped? (ie for how long is the vitamin D supplement recommended?)</b>                                                  |                |
| <b>9. In your unit, is ferrous sulphate prescribed for preterm infants? If yes, what is the criteria (birthweight, gestational age, other?)</b>       |                |
| <b>10. What is the inpatient prophylactic (baby not anaemic) ferrous sulphate dose (in ml)</b>                                                        |                |
| <b>11. Is ferrous sulphate prescribed on discharge? If yes, what is the criteria for who gets it?</b>                                                 |                |
| <b>12. If yes, what is the prophylactic (baby not anaemic) ferrous sulphate dose (in ml) on discharge?</b>                                            |                |
| <b>13. When is this ferrous sulphate stopped? (ie for how long is the ferrous sulphate supplement recommended?)</b>                                   |                |
| <b>14. What other vitamin and mineral supplements are routinely prescribed (without proven deficiency) in your neonatal unit?</b>                     |                |
| Folic acid                                                                                                                                            |                |
| Calcium                                                                                                                                               |                |
| Phosphate                                                                                                                                             |                |
| Zinc                                                                                                                                                  |                |
| Vitamin E                                                                                                                                             |                |
| Vitamin A (not as Vitadol C or Pentavite)                                                                                                             |                |
| Other (please specify)                                                                                                                                |                |
